# Supplementary material for: Oxygen vacancy-enriched ZIF-8-encapsulated Au nanoparticles for boosting electrochemical dopamine sensing
Source: Royal Society of Chemistry journal article supplement (doi:10.1039/d4dt03545c), 2025-01-01
Supplement: d4dt03545c1.pdf [file d4dt03545c1.pdf]

## Supporting Information

### **Oxygen Vacancy Enriched ZIF-8 Encapsulated Au Nanoparticles Boosts Electrochemical Dopamine Sensing**

Dawei Yan<sup>a</sup>, Xiaoxia Zhou<sup>b</sup>, Xiaoqing Jia<sup>a</sup>, Shengke Zhu<sup>a</sup>, Zizhao Wang<sup>a</sup>, Guisheng Li<sup>a</sup>, Shige Wang<sup>a\*</sup>

<sup>a</sup>School of Materials and Chemistry, University of Shanghai for Science and Technology, Shanghai 200093, China

<sup>b</sup>School of Energy and Materials, Shanghai Polytechnic University, Shanghai, 201209, China

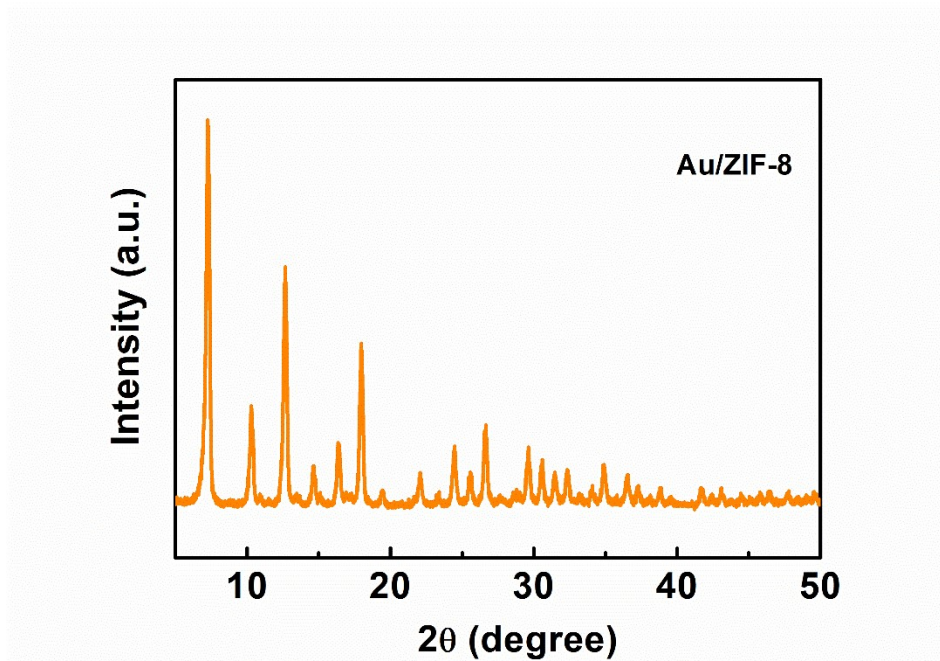

Figure S1. XRD pattern of the reference sample Au/ZIF-8.

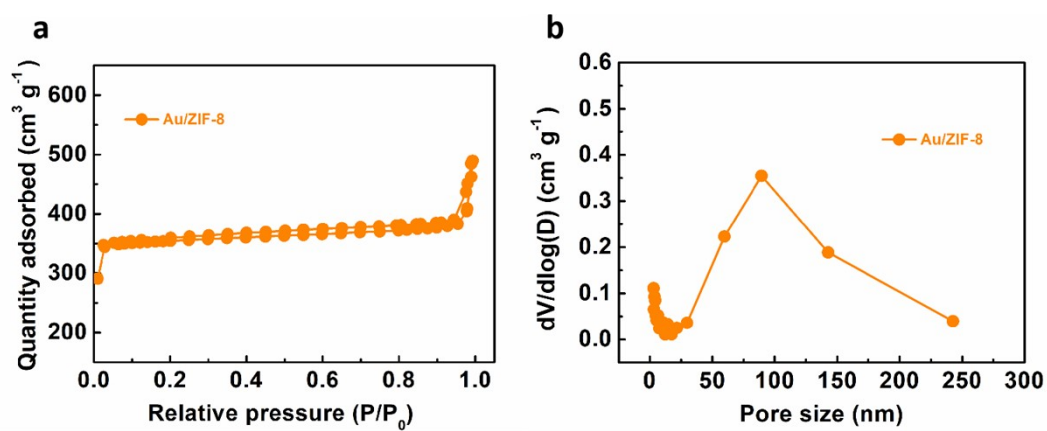

Figure S2.  $N_2$  adsorption/desorption isotherms (a) and the corresponding pore size distribution curves (b) of the reference sample Au/ZIF-8.

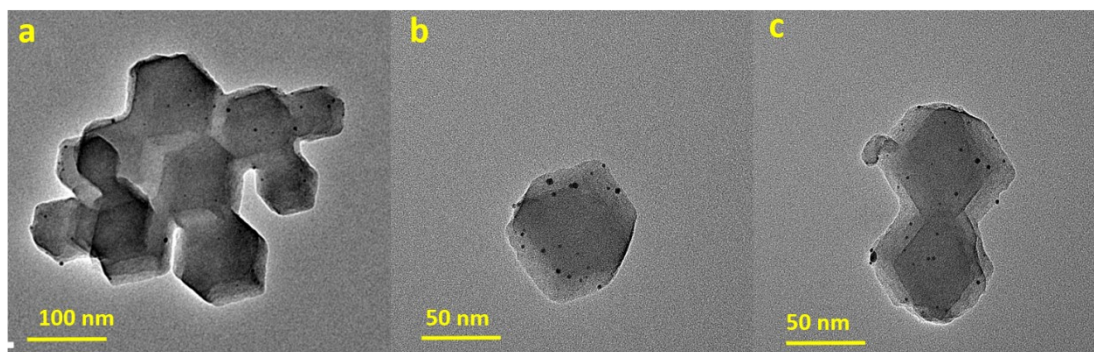

**Figure S3.** TEM image (a-c) and the corresponding EDS spectrum of the sample Au@ZIF-8.

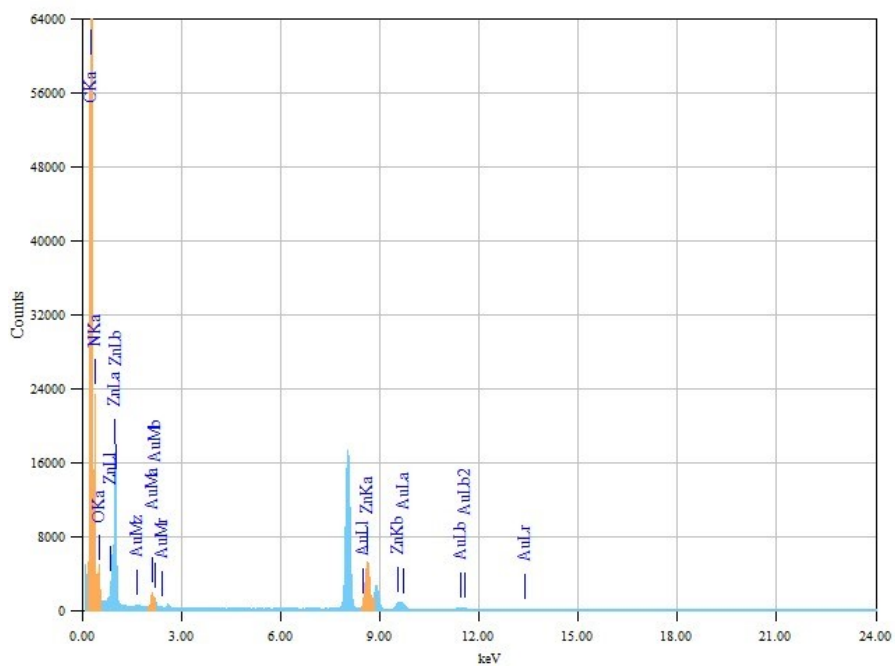

**Figure S4.** The corresponding EDS spectrum of the sample Au@ZIF-8.

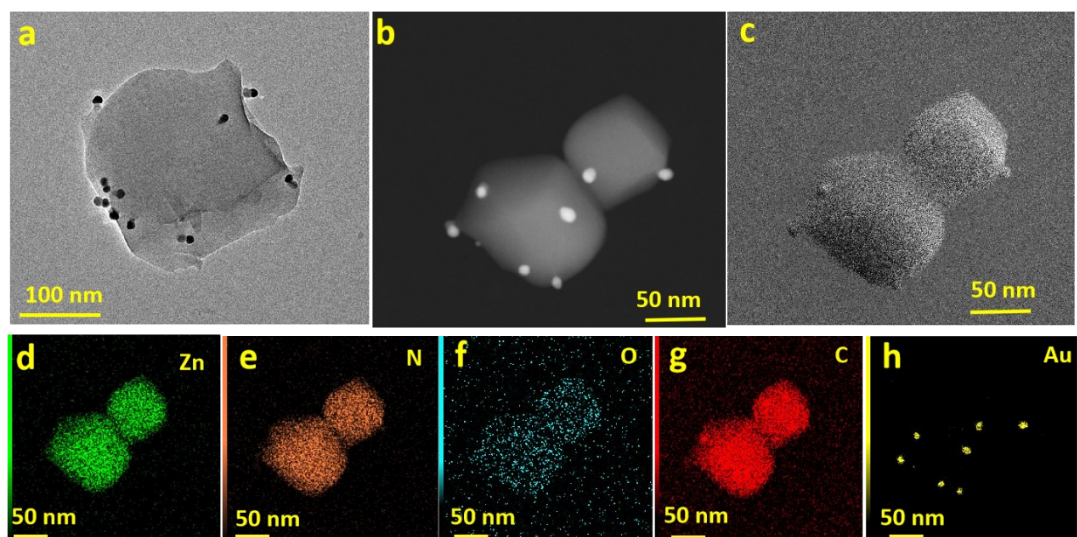

**Figure S5.** (a) TEM images, (b) bright-field image, (c) back scattering image and (d-h) the elemental mapping imaged and corresponding Zn, N, O, C, Au elements in the selected region of Au/ZIF-8.

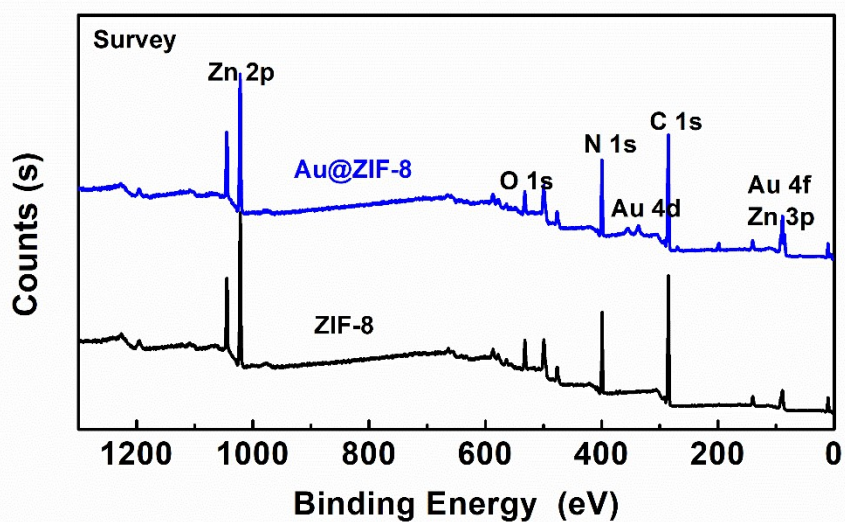

**Figure S6.** XPS survey spectra o for the as-prepared samples ZIF-8 and Au@ZIF-8.

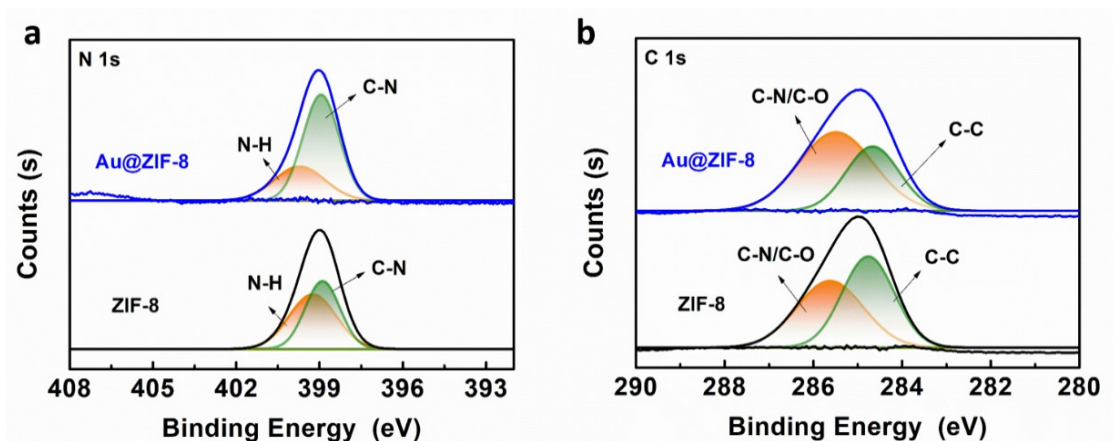

**Figure S7.** XPS survey spectra of C 1s (a) and N 1s (b) for ZIF-8 and Au@ZIF-8 samples.

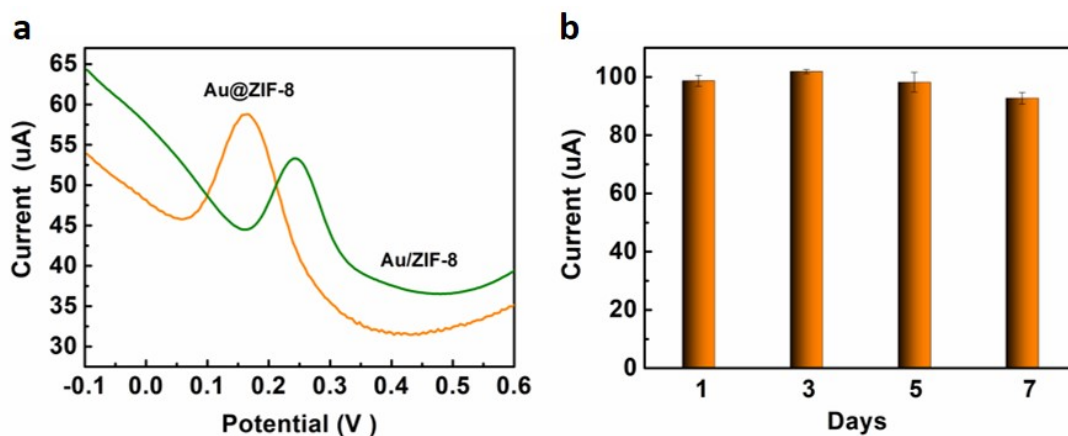

**Figure S8.** Electrochemical performance. (a) Differential pulse voltammetry (DPV) on the Au@ZIF-8 and Au/ZIF-8 in the absence and presence of 100  $\mu\text{M}$  DA. (b) Stability study of the reference Au/ZIF-8 based on the CV curves in 0.1 M PBS including 100  $\mu\text{M}$  DA (scan rate: 50  $\text{mVs}^{-1}$ ; pH = 7.4).



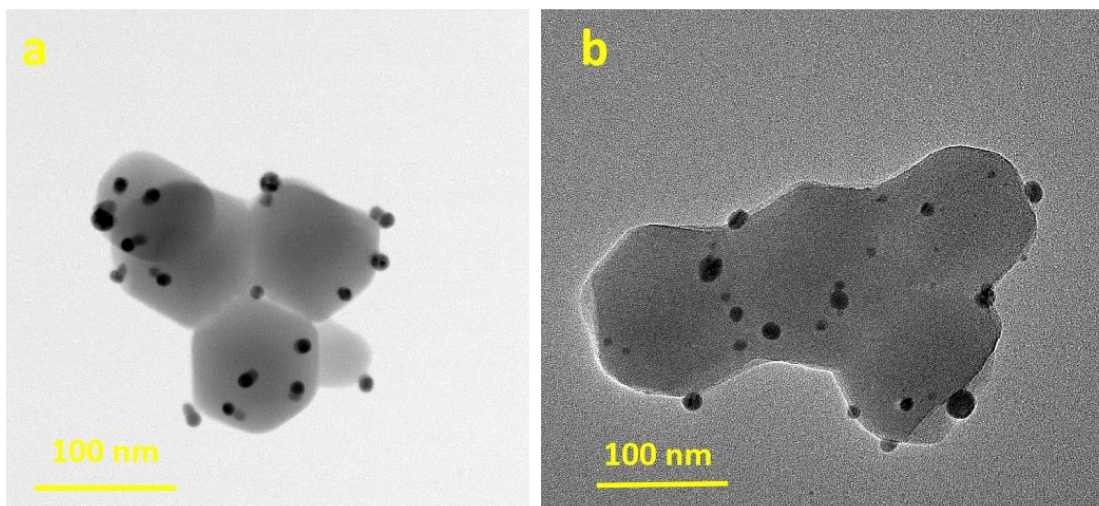

**Figure S9.** (a-b) TEM images of the reference Au/ZIF-8 after stability test.

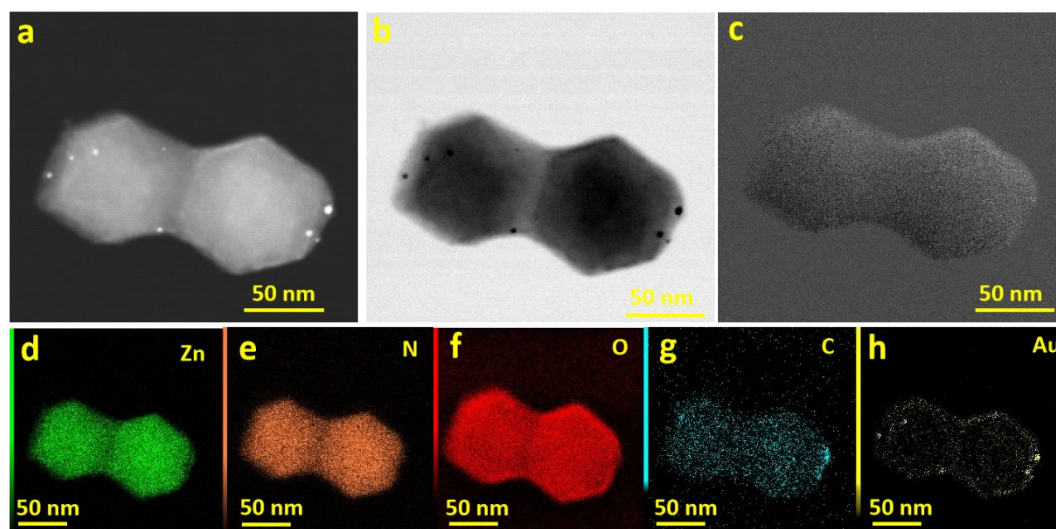

**Figure S10.** Morphology characterization of Au@ZIF-8 after stability test. (a) bright-field image (b) dark-field image, (c) back scattering image and (d-h) the elemental mapping imaged and corresponding Zn, N, O, C and Au elements in the selected region of Au@ZIF-8.

**Table S1.** Texture properties and the content of Au of the ZIF-8 and Au@ZIF-8 samples.

| Samples  | BET<br>(m <sup>2</sup> g <sup>-1</sup> ) | V <sub>micro</sub><br>(cm <sup>3</sup> g <sup>-1</sup> ) | Average pore size<br>(nm) | V <sub>total</sub><br>(cm <sup>3</sup> g <sup>-1</sup> ) | Au<br>(wt %) |
|----------|------------------------------------------|----------------------------------------------------------|---------------------------|----------------------------------------------------------|--------------|
| Au/ZIF-8 | 1164                                     | 0.48                                                     | 3.1                       | 0.75                                                     | 1.07         |
| ZIF-8    | 669                                      | 0.28                                                     | 2.3                       | 0.38                                                     | /            |
| Au@ZIF-8 | 1217                                     | 0.49                                                     | 3.1                       | 0.90                                                     | 1.02         |
